# Supplementary material for: Serum Metabonomic Research of the Anti-Hypertensive Effects of Ogaja on Spontaneously Hypertensive Rats
Source: MDPI journal article supplement (doi:10.3390/metabo10100404), 2020-10-12
Supplement: s1 [file s1]

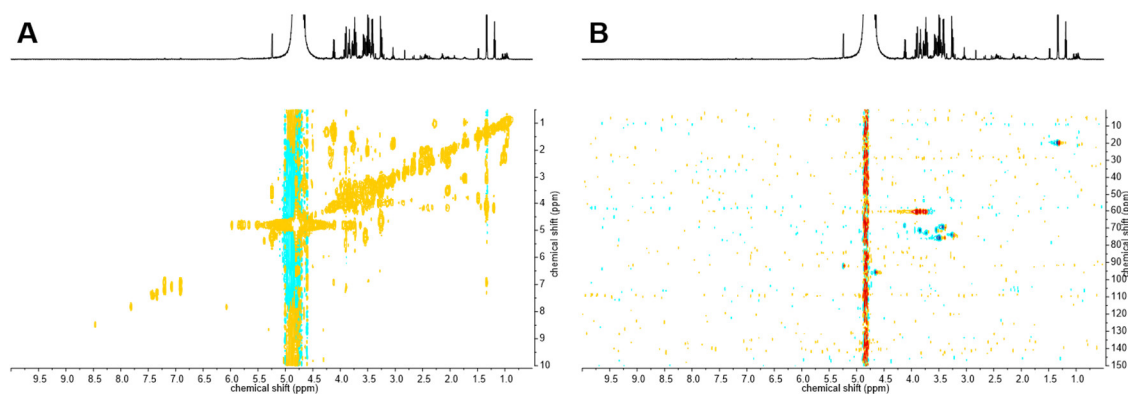

**Figure 1.** Representative 2D NMR spectra of SHR serum.  $^1\text{H}$ - $^1\text{H}$  correlation spectroscopy (COSY) spectrum (A) and  $^1\text{H}$ - $^{13}\text{C}$  heteronuclear single quantum coherence spectroscopy (HSQC) spectrum (B).

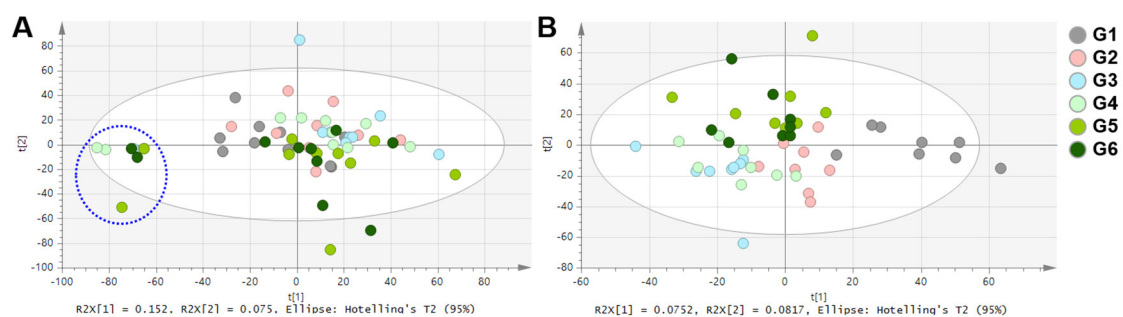

**Figure 2.** Multivariate statistical analyses of NMR spectra. Principal component analysis (PCA) score plot ( $R^2\text{X}=0.448$ ,  $Q^2=0.119$ ) (A) and partial least squares discriminant analysis (PLS-DA) score plot ( $R^2\text{X}=0.157$ ,  $R^2\text{Y}=0.261$ ,  $Q^2=0.0838$ ).
